# Supplementary material for: Shock growth of ice crystal near equilibrium melting pressure under dynamic compression
Source: PubMed Central journal article supplement — Proc Natl Acad Sci U S A. 2019 Apr 15;116(18):8679–84. doi: 10.1073/pnas.1818122116 (PMC6500116; doi:10.1073/pnas.1818122116), 2019-04-15
Supplement: pnas.1818122116.sapp.pdf [file pnas.1818122116.sapp.pdf]

## Supplementary information

# Revealing Origin of Shock Growth of Ice Crystal near Equilibrium Melting Pressure: A Dimensional Growth Transition on Dynamic Compression

Yong-Jae Kim<sup>1</sup>#, Yun-Hee Lee<sup>1,2</sup>#, Soohyeong Lee<sup>1,2</sup>, Hiroki Nada<sup>3\*</sup>, Geun Woo Lee<sup>1,2\*</sup>

<sup>1</sup>Division of Industrial Metrology, Korea Research Institute of Standards and Science (KRISS), 34113, Republic of Korea

<sup>2</sup>Department of Nano Science, University of Science and Technology (UST), Daejeon 34113, Republic of Korea

<sup>3</sup>National Institute of Advanced Industrial Science and Technology (AIST), Tsukuba 305-8569, Japan

# Y.-J. Kim and Y.-H. Lee contributed equally to this work.

\*To whom correspondence should be addressed. E-mail: gwlee@kriss.re.kr, hiroki.nada@aist.go.jp

### 1. Direct measurement of dDAC movement with a Michelson interferometer

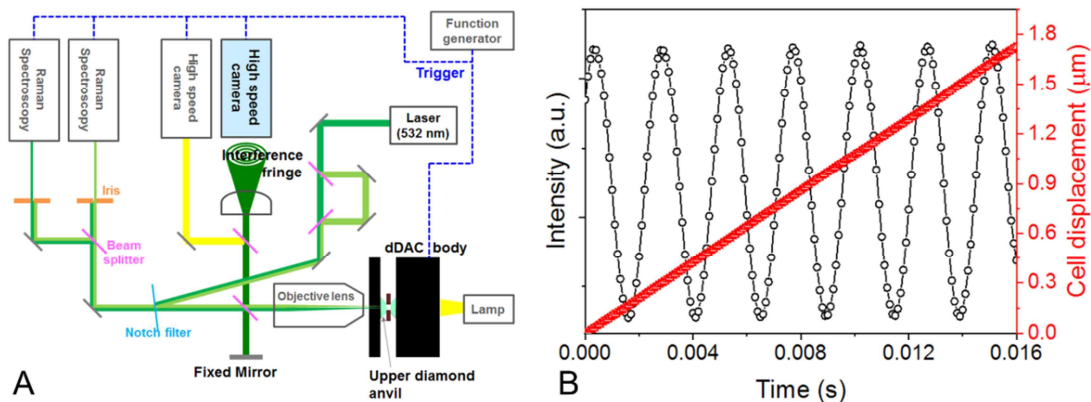

Fig. S1. (A) Schematic of dDAC setup with interferometric system. (B) Intensity change of interference pattern during compression and resulting cell displacement with time.

Dynamic diamond anvil cell (dDAC) described in previous studies [S1-S3] modulates pressure of sample by piezoelectric actuators; the actuators embedded in the dDAC body cause dynamic (de)compression of a gasket cell, containing sample at a fixed static pressure. We assume that elastic deformation of diamond anvils is negligible and confirm that the lower diamond anvil is strongly fixed on the dDAC body. Thus, the thickness change ( $\Delta l$ ) of gasket cell during (de)compression is identical to the moving displacement of the upper diamond anvil. Here, we continuously monitor the movement of the upper anvil with a Michelson interferometer integrated into the dDAC system (see Fig. S1A); when piezoelectric

1 actuators push or pull the upper plate of dDAC, on which the upper anvil is mounted, the  
2 laser beam reflected from table face of the upper diamond anvil makes dynamic interference  
3 pattern with the reference laser beam reflected from the fixed mirror. Power of the incident  
4 laser beam was limited to less than 2 mW in order to minimize heating the sample chamber.  
5 Intensity variation of the interference pattern recorded with a high-speed camera was fitted  
6 with a sinusoidal function to obtain the phase angles ( $\theta$ ) of each data points (Fig. S1B).  
7 Finally, the displacement ( $\Delta l$ ) was calculated as shown in Fig. S1B based on the relation of  
8  $n\lambda = 2\Delta l$ , where  $\lambda$  is the wavelength of incident laser (532 nm) and  $n$  is the number of fringe  
9 order ( $\theta/2\pi$ ). Even in the hold step formed by applying a constant voltage to the actuators, a  
10 minute variation of the interference intensity was recorded and this is converted to standard  
11 deviation of the displacement measurement of  $\pm 43.92$  nm.

12

## 13 **2. Quantitative analyses on compression strain and strain rate**

14 Upon compression, sample strain is calculated by dividing the measured displacement  
15 ( $\Delta l$ ) by the initial gasket thickness ( $l_0$ ) and subsequently the strain rate is calculated by  
16 dividing the strain ( $\Delta l/l_0$ ) with the compression time ( $t$ ). Assuming that the area of gasket hole  
17 ( $A_0$ ) does not change upon dynamic (de)compression, the measured strain can be same with  
18 the volume strain of sample ( $\varepsilon_V$ ), as follows;  $\varepsilon_V = \Delta V/V_0 = (\Delta l \cdot A_0)/(l_0 \cdot A_0) = \Delta l/l_0$ ,  
19 where  $\Delta V$  is the change of the sample volume by dynamic (de)compression,  $V_0$  is initial  
20 volume of sample (or gasket cell) at ambient pressure.

21 In order to measure standard deviations of the strain and the strain rate, we check the  
22 measurement uncertainty of the initial gasket thickness and the displacement; the initial  
23 gasket thickness measurement carries a uncertainty of  $\pm 500$  nm and the displacement  
24 measurement using the Michelson interferometer carries a uncertainty of  $\pm 43.92$  nm. Since  
25 we generate the trapezoidal function with different compression rates by controlling the cycle  
26 period for a given voltage amplitude, standard deviation of the measured strain for each  
27 sample chamber has a constant value; the measured strain is  $0.0273 \pm 8.70 \times 10^{-4}$  when the anvil  
28 displacement of  $1.33 \mu\text{m}$  is considered for the initial cell thickness of  $49 \mu\text{m}$ . The specific  
29 chamber dimension and testing condition is same with that for Figs. 1A and 1B. Here, the  
30 standard deviation of the strain rate changes with the compression time; for the strain rate of  
31 0.181, we expect a standard deviation of  $\pm 6.00 \times 10^{-3}$  /s.

1           When the displacement of 1.33  $\mu\text{m}$  corresponding to the driving voltage amplitude of  
2 500 mV (to the piezoelectric actuators) is considered for the compression time in the range of  
3 20 ms  $\sim$  100 s, the compression speed varies from  $1.33 \times 10^{-8}$  to  $6.65 \times 10^{-5}$  m/s. The diffusion  
4 speed of water molecules at the equilibrium melting pressure is determined as 5.78 m/s when  
5 the diffusivity and interatomic distance between oxygen atoms are given by  $1.67 \times 10^{-9}$   $\text{m}^2/\text{s}$   
6 and  $2.89 \times 10^{-10}$  m, respectively [S4, S5]. The diffusion speed of water molecules is about  $10^4$   
7 times faster than the compression speed. Therefore, we can neglect the possibility of  
8 inhomogeneous local density variation in the water due to the dynamic compression. In  
9 addition, the strain rate by ramping in this study is still much smaller than shock (dynamic)  
10 compression ( $\gg 10^4$  /s) [S6]. Thus, we believe that this experimental condition is nearly  
11 matches hydrostatic condition even though crystal growth occurs inside of the water sample.  
12

### 13 **3. Ice VI crystal growth in 3-d and 2-d modes under different compression rates**

14           Fig. S2 shows crystal growths for three different compression times (10 s, 250 ms,  
15 and 20 ms). Early stages of the crystal growth exhibits same behavior for all the three cases;  
16 the rounded 3-d crystal becomes faceted crystal. Here, we can clearly observe that the parallel  
17 growth of the  $\{112\}$  plane is faster than the vertical growth; the edges in the culet-parallel  
18 direction already forms sharply, while the edges in the vertical direction is still growing (See  
19 Fig. S2A). The different growth speed of crystal planes is well known phenomenon in early  
20 stage of crystal growth due to anisotropic property, which is not an equilibrium shape [S7].  
21 We can observe same phenomenon with 250-ms ramping time which is relatively slow  
22 compression (See Fig. S2B), and 20-ms ramping time with shock growth (Fig. S2C). In the  
23 case of 20-ms compression time, once the shock growth occurs from the parallel  $\{112\}$   
24 planes, the overpressure decreases. And thus, there is no longer sufficient driving force  
25 available to form the 2-d shock growth in the vertical  $\{112\}$  planes. Therefore, the 2-d shock  
26 crystal growth is dominated by the interface property from the crystallographic viewpoint  
27 because it occurs after a noticeable faceting of the rounded initial crystal. Also its occurrence  
28 can be affected by the sequence of facet plane formation with acute corners and clean edges.

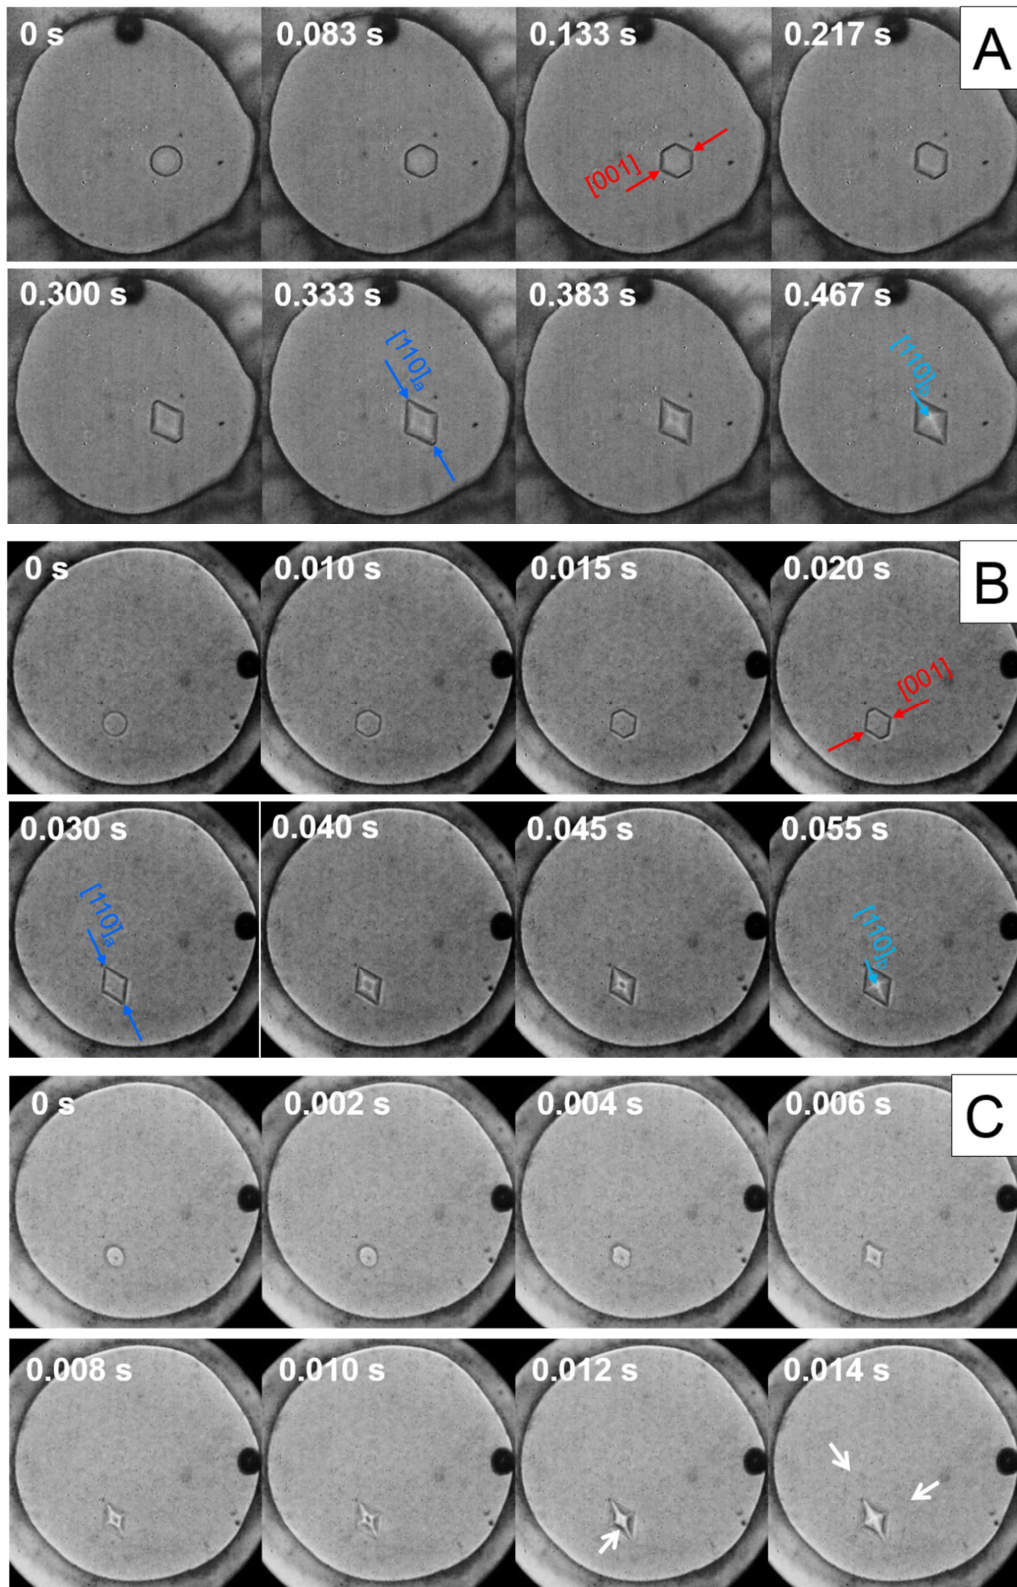

1

2

3

4 Fig. S2. Regardless of the shock crystal growth, faceting of a rounded starting crystal occurs at the early stage of  
 5 the compression. A polygonal crystal was shaped from the rounded seed, then grew along the perpendicular  
 6 direction and finally formed a 3-d faceted polyhedron for (A) slow ramping with compressing time of 10 s and  
 7 (B) moderate ramping with compression time of 0.25 s. (C) For the case of fast ramping with compression time

1 of 20 ms, similar faceting process was observed but 2-d shock crystal growth along the in-plane direction  
2 occurred before formation of an acute corner along the perpendicular direction.

#### 4. Surface indexing for 3-d faceted and 2-d shock-grown ice VI crystals

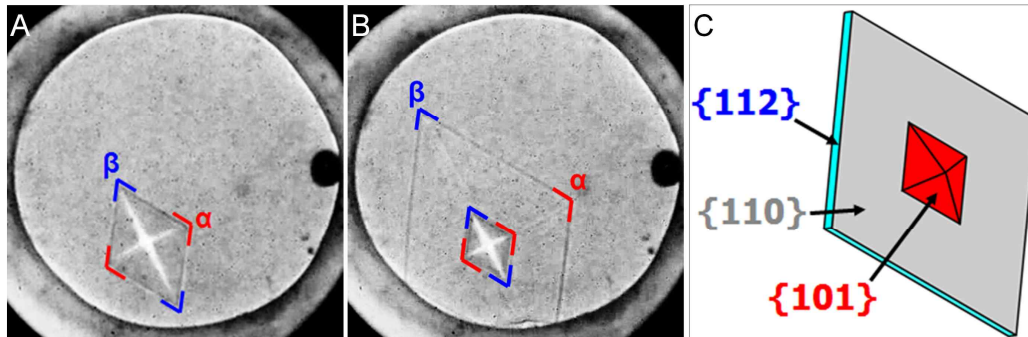

5 Fig. S3. Morphologies of (A) 3-d octahedral and (B) 2-d shock-grown rhombic crystals. Both crystals have same  
6 corner angles of  $\alpha = \sim 114^\circ$  and  $\beta = \sim 66^\circ$ . (C) Plane indexing for a shock-grown 2-d crystal having 3-d faceted  
7 mother crystal at its center.  
8  
9

10 Crystal planes can be indexed based on geometric characteristics (e.g., corner angles)  
11 and crystallographic information. 3-d and 2-d crystals have same corner angles of  $\alpha = \sim 114^\circ$   
12 and  $\beta = \sim 66^\circ$  (Figs. S3A and B), indicating an identical crystalline orientation regardless of the  
13 growth behavior. For a tetragonal lattice, the included angle ( $\phi$ ) between two planes of  $(h_1k_1l_1)$   
14 and  $(h_2k_2l_2)$  is given. As a result of various  $(hkl)$  combination with the lattice parameter of ice  
15 VI,  $a = 0.61812$  nm and  $c = 0.5689$  nm [S8], four edge planes forming  $\alpha$  and  $\beta$  angles are  
16 found to be  $\{112\}$  planes family; the  $(112)$  plane have interplanar angle of  $113.89^\circ$  with the  
17  $(11\bar{2})$  plane and  $66.11^\circ$  with the  $(\bar{1}\bar{1}2)$  plane, which are nearly identical with the experimental  
18  $\alpha$  and  $\beta$  angles. While corner direction along the short axis of the octahedral crystal is  
19 determined as  $\langle 001 \rangle$ , those along the long axes are  $\langle 110 \rangle$ . Finally, morphology of 3-d and 2-d  
20 crystal can be described as octahedron covered by  $\{101\}$  crystal planes and rhombic plate  
21 covered by four  $\{112\}$  and two  $\{110\}$  crystal planes, respectively. Our indexing for the 3-d  
22 crystal is supported by Yamamoto [S9], who also observed  $\{101\}$  ice VI crystal formation  
23 under static high-pressure with X-ray precession photographs.  
24

#### 25 5. Effect of different DAC boundaries (or different chamber thickness) on 2-d shock 26 crystal growth

27 In order to check the dependence of the 2-d shock crystal growth on boundary condition  
28 (or dimensional shape) of the sample chamber, we prepared three gaskets with different initial  
29 thicknesses of 17, 53 and 91  $\mu\text{m}$ , but with the same diameter of the gasket hole of 100  $\mu\text{m}$ .

1 When fast compression of  $6.65 \times 10^5$  m/s (or compression time of 20 ms) is applied, the shock  
 2 crystal growth is observed for all experimental conditions. Fig. S4 shows the shock crystal  
 3 grown in the sample chamber with 91  $\mu\text{m}$  in thickness and 100  $\mu\text{m}$  in diameter. This result  
 4 vindicates that the boundary condition of the sample chamber is not a crucial factor for the  
 5 shock crystal growth.

Chamber thickness: 91  $\mu\text{m}$ , chamber diameter: 100  $\mu\text{m}$ ,  
 compression time: 20 ms

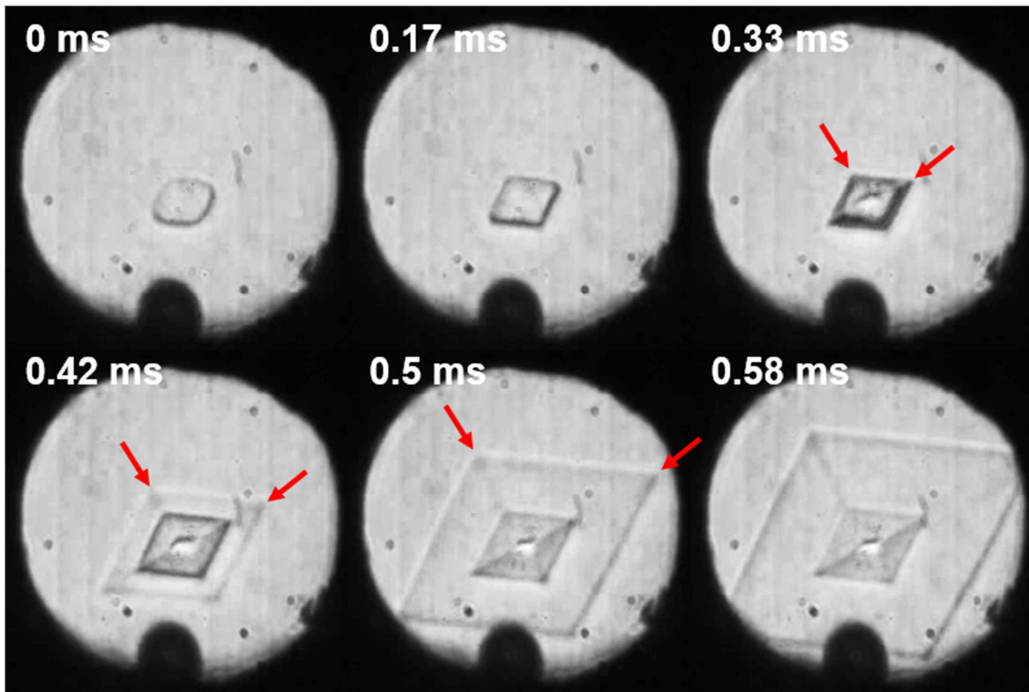

6  
 7 Fig. S4. Faceting and shock crystal growth evolved in a chamber with comparable dimensions along diameter  
 8 and thickness directions.  
 9

## 10 6. Estimation of thickness of the 2-d shock grown crystal

11 If we assume that volumetric growth rates of 3-d and 2-d crystals are identical for short  
 12 duration, thickness of the 2-d shock grown crystal can be estimated by equating the volume  
 13 increase of the 3-d crystal with that of the 2-d crystal for a given strain increment. In the case  
 14 of a rhombohedral plate of the 2-d crystal (Fig. S3B), its crystal volume ( $V_{2-d}$ ) is  
 15  $2d_{110}d_{001}h$ , where  $h$  is the thickness of the 2-d crystal;  $V_{2-d}$  can be simplified into  
 16  $3.06842 \cdot h \cdot d_{001}^2$ . Fig. S5 shows growth displacements in  $\langle 001 \rangle$  direction, ( $d_{001}$ ) for 3-d and  
 17 2-d growth. Immediately following the shock initiation indicated by an arrow in Fig. S5, the  
 18 thickness of the 2-d crystal can be calculated by assuming that  $\Delta V_{3-d}$  is equal to  $\Delta V_{2-d}$  for a

1 short duration.

2 2-d grown area was analyzed from one or two image frames after the shock moment  
3 corresponding to the elapsed time of 0.67 ms for a few crystals. A volume increase of the 3-d  
4 facet crystal was also measured from the crystal size change with the same time. Since the 3-  
5 d crystal have an octahedral geometry with short  $\langle 001 \rangle$  and long  $\langle 110 \rangle$  corners (Fig. S3A),  
6 its volume ( $V_{3-d}$ ) can be given by  $\frac{4}{3}d_{110}^2 d_{001}$ , where  $d_{hkl}$  is dimension of growing axis along  
7  $\langle hkl \rangle$  directions;  $V_{3-d}$  can be reduced to  $3.1381 \cdot d_{001}^3$ , considering the lattice parameters  
8 of ice VI ( $a = 0.61812$  nm and  $c = 0.5689$  nm [S8]) and the geometric relation of  $d_{110} =$   
9  $\frac{\sqrt{2}a}{c}d_{001}$  in tetragonal lattice. As a result,  $h$  is determined to be  $132.62 \pm 32.07$  nm.

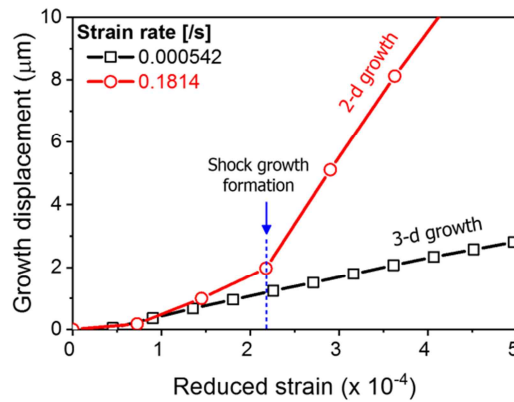

10  
11 Fig. S5. Growth displacement along  $\langle 001 \rangle$  corner direction for 3-d and 2-d growth under compression strain  
12 rate of 0.000542 /s and 0.1814 /s, respectively. The onset of shock growth is marked by an arrow.  
13

14 In order to check the latent heat formation by the 2-d shock crystal growth, we consider a  
15 simple model system. If a lozenge-shaped, 2-d crystal advances by 5  $\mu\text{m}$  from a 3-d  
16 octahedral crystal with a long diagonal axis of 10  $\mu\text{m}$ , the shock-grown volume of the 2-d ice  
17 crystal is 12.47  $\mu\text{m}^3$  (or  $9.22 \times 10^{-13}$  mol) with the nominal thickness of 130 nm. This growth  
18 releases the latent heat of  $5.37 \times 10^{-9}$  J. The molar volume and latent heat of ice VI are given as  
19  $1.35 \times 10^{-5}$   $\text{m}^3/\text{mol}$  and 5.83 kJ/mol, respectively [S10]. If the sample chamber with 100  $\mu\text{m}$  in  
20 diameter and 50  $\mu\text{m}$  in thickness is filled with liquid water at 0.96 GPa and ambient  
21 temperature, the released latent heat can heat up the water mass of  $4.84 \times 10^{-7}$  g to about  
22 0.0030 K. The molar volume, molar mass and heat capacity of the water are  $1.46 \times 10^{-5}$   
23  $\text{m}^3/\text{mol}$ , 18.02 g/mol and 3.76 J/(g·K), respectively [S11]. We currently do not have capability  
24 to measure such a minor increase in temperature.

1  
2  
3

## 7. Uncertainty of pressure measurement

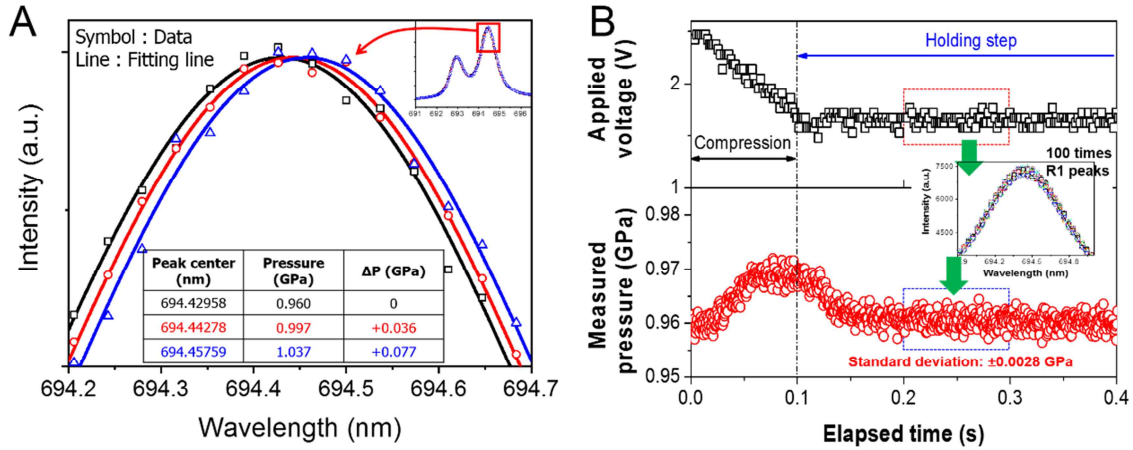

4  
5  
6  
7  
8

Fig. S6. (A) Ruby fluorescence peak (R1) enlarged from peaks in the inset. Red and blue data exhibit peak shift about 0.0132 and 0.0280 nm from equilibrium melting state (black data), corresponding to the overpressure about 0.036 and 0.077 GPa, respectively. (B) Standard deviation of the pressure measurement is given by  $\pm 2.8$  MPa.

9  
10  
11  
12  
13  
14  
15  
16  
17  
18  
19  
20  
21  
22  
23  
24

Uncertainty of pressure measurement is essentially determined by the resolution of ruby fluorescence peak (R1) measurement. Fig. S6A shows the ruby fluorescence signal during compression, which shows a clear shift of the R1 peak. Our Raman spectroscopy setup provides a pixel resolution of  $\sim 0.0368$  nm/pixel corresponding to the pressure level of  $\sim 0.1$  GPa/pixel based on the well-known relation between R1 peak shift and pressure [S12]. However, more precise pressure estimation can be achieved by determining the wavelength centroid of the R1 peak via Gaussian fitting (see Fig. S6A). The standard deviation of the pressure is measured at a constant pressure value in the trapezoidal holding regime. More than hundred R1 peaks from the hold regime are analyzed; the standard deviation for the R1 peak center is  $\pm 0.0010$  nm which corresponds to the pressure standard deviation of  $\pm 0.0028$  GPa (see Fig. S6B). This precise pressure measurement is possible because small ruby balls with micron size are used and fully enclosed by the water at the melting pressure. In addition, the pressure range during the measurement is relatively narrow less than 0.06 GPa during crystal growth, shape distortion (or merging) of the ruby double peaks is negligible;  $\Delta\lambda$  between two ruby peaks was  $1.4497 \pm 0.0015$  nm regardless of compression rate or compression cycle.



## 8. Detection of the onset of the anomalous 2-d shock growth

We detect the onset of the 2-d shock growth by monitoring the sudden increase of growth displacement (see Fig. S7). Interestingly, in spite of the coexistence of water and ice, pressure increases above the equilibrium melting pressure under fast compression (see Fig. S7). Such overpressure implies that crystal growth is delayed even under the significant accumulation of driving force for crystal growth due to a kinetic barrier at the crystal-liquid interface. After the instant of the 2-d shock growth (marked by an arrow in Fig. S7), the overpressure still increases but at a reduced rate. This observation indicates that the anomalous shock growth occurs under local non-equilibrium growth condition.

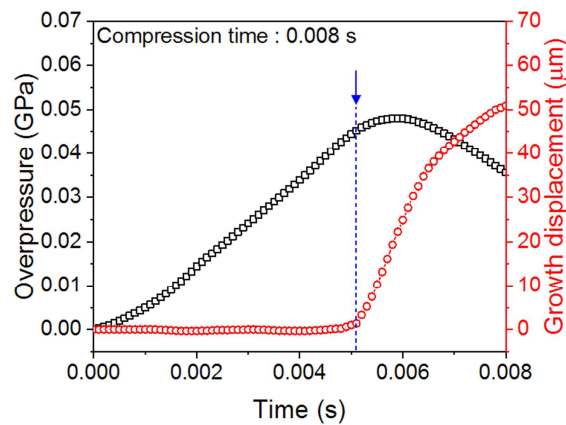

Fig. S7. Simultaneous measurements of both pressure and crystal growth displacement with time. The onset of the 2-d shock growth is marked by an arrow and dashed line.

## 9. Prediction of effective overpressure and determination of density partitioning at crystal-liquid interface

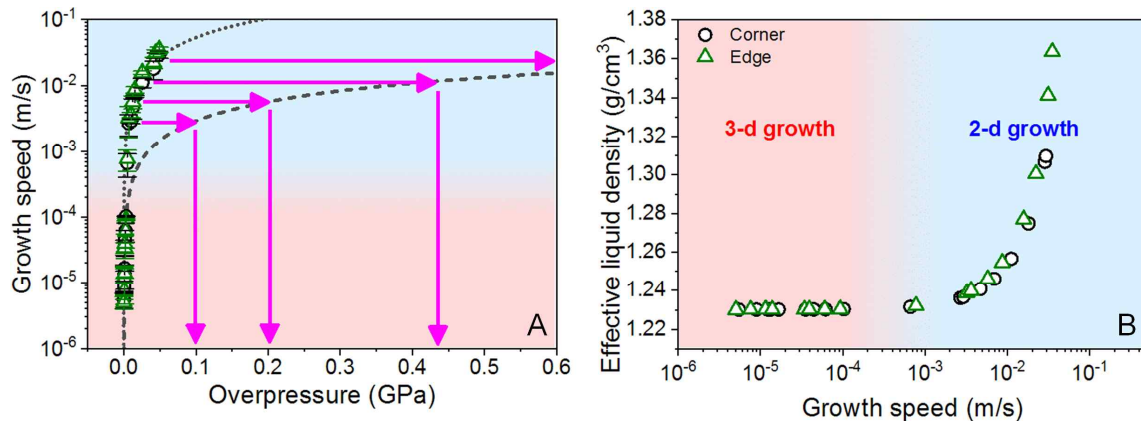

Fig. S8. (A) Growth speed vs overpressure plot in Fig. 3B with extended overpressure range. The arrows indicate the way to estimate the effective overpressure; (B) Plot of effective liquid density with growth speed.

1 As analogous to the diffusionless solidification in alloy systems via solute trapping  
2 [S13-S15], rapid crystal growth of pure substance or colloidal systems under large driving  
3 force may accompany defect (or density) trapping [S16, S17]. As a result of the rapidly  
4 advancing interface, defects or free volume in liquid can be frozen into solid without defect  
5 partitioning at the interface. Thus the partition coefficient (i.e., the ratio of liquid to solid  
6 density at interface) becomes close to unity with increasing growth speed. Besides the Aziz's  
7 model [S13] on the solute trapping, Jackson et al. developed a power law function for the  
8 partition coefficient [S14] and Sobolev extended the solute trapping theories to local non-  
9 equilibrium diffusion model [S15]. The partition coefficient under local equilibrium changes  
10 into that under local non-equilibrium by considering relaxation effect of solute.

11 To estimate partition coefficient under fast compression, we attempted to obtain the  
12 effective overpressure and the effective water density at the 3-d crystal surface. The effective  
13 overpressure necessary for inducing fast growth of the 3-d crystal, which is equivalent to the  
14 2-d shock growth speed, can be estimated from the extrapolation of the growth speed fitting  
15 for the 3-d facet crystal (Fig. S8A). The predicted value for the effective overpressure is  
16 converted to molar volume based on the third-order Birch-Murnaghan equation of state (EOS)  
17 with  $V_0 = 18.145 \text{ cm}^3/\text{mol}$ ,  $K_0 = 1.986 \text{ GPa}$ , and  $K_0' = 8.66 \text{ GPa}$  for water [S18] and  
18 supercompressed water (Fig. S8B). EOS parameters for ice VI are  $V_0 = 14.17 \text{ cm}^3/\text{mol}$ ,  $K_0 =$   
19  $14.01 \text{ GPa}$ , and  $K_0' = 4 \text{ GPa}$  [S19]. Density of water is obtained by dividing the molar volume  
20 by the molar mass of water ( $18.015 \text{ g/mol}$ ). Finally, partition coefficient is calculated as  
21 shown in Fig. 5 which is fitted with the Aziz's model of  $k = (k_{Eq} + v/v_{Di})/(1 + v/v_{Di})$   
22 [S13], where  $k_{Eq}$  is the equilibrium partition coefficient at melting pressure (0.9106),  $v$  is the  
23 measured growth speed,  $v_{Di}$  is the fitted characteristic speed for density trapping and given by  
24  $0.04224 \text{ m/s}$ . We note that ice density is assumed to be negligibly affected by the effective  
25 overpressure that exists locally within interface regime and thus remains constant ( $1.35 \text{ g/cm}^3$ )  
26 during dynamic compressions.

## 27 28 **9. Information on MD simulation; potential model and growth speed calculation**

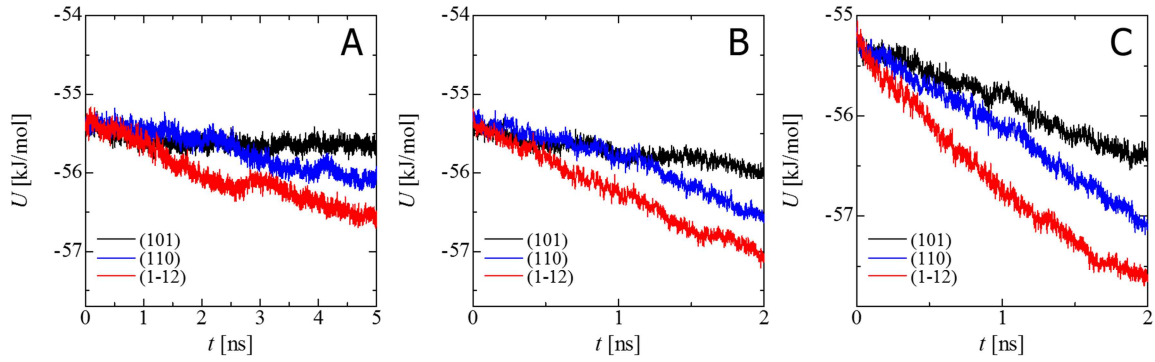

1  
2 Fig. S9. Time-sequence of the potential energy of the system during growth of (101), (110), and (112) planes  
3 under overpressure ( $\Delta P$ ) of 0.08, 0.38, and 0.58 GPa (A-C).

4  
5 Growth behavior of (101), (110), and (112) planes of ice VI crystal were explored in MD  
6 simulation with the TIP4P/ice potential model [S20]. This potential is available to the  
7 temperature-pressure range where ice VI exists. Three simulation systems were prepared for  
8 depicting the (101), (110) and (112) planes of an ice VI crystal exposed to supercompressed  
9 water. Each system, which consisted of bulk ice and water layers confined in a rectangular-  
10 parallelepiped with three-dimensional periodic boundary conditions, was created in the same  
11 manner as described in the reference [S21]. Because of the periodic boundary conditions, two  
12 ice-water interfaces were created in each system. For both (101) and (110) systems, bulk ice  
13 and water layers consist of 2560 and 5120 H<sub>2</sub>O molecules, respectively. For the (112) system,  
14 bulk ice and water layers consist of 2264 and 4528 H<sub>2</sub>O molecules, respectively.

15 According to the literature [S20], the pressure at which ice VI is in equilibrium with water  
16 at 298 K in the TIP4P/Ice model is approximately 1.4 GPa. In our simulation of the (101)  
17 system at 298 K, growth occurred at 1.45 GPa and melting occurred at 1.4 GPa, whereas  
18 neither growth nor melting occurred at 1.42 GPa. Thus, we assume that the equilibrium  
19 pressure is 1.42 GPa. The initial dimensions of each system corresponds to the equilibrium  
20 dimensions at 298 K and the equilibrium melting pressure;  $4.91 \times 3.39 \times 10.47 \text{ nm}^3$  for the (101)  
21 system,  $4.68 \times 3.48 \times 10.73 \text{ nm}^3$  for the (110) system, and  $5.25 \times 3.14 \times 9.42 \text{ nm}^3$  for the (112)  
22 system. The MD simulation for the growth of ice VI was performed for the pressure values of  
23 1.5, 1.75 and 2.0 GPa, corresponding to the overpressure ( $\Delta P$ ) of 0.08, 0.33 and 0.58 GPa at  
24 298 K. Since the MD simulation was performed under isothermal and isobaric condition, the  
25 volume of the system decreased as ice VI grew. The crystal growth speed was obtained along  
26 different crystal planes by taking the derivatives of the potential energy change with time (Fig.

1 S9) and summarized in Fig. 4B. According to the reference [S21], crystal growth speed ( $v$ )  
2 were determined by  $\frac{1}{n_{\text{int}} \Delta u_{\text{iw}}} \left( \frac{dU}{dt} \right) \frac{d_l}{N_l}$ . Here,  $n_{\text{int}} = 2$  is the number of the interfaces included in  
3 the system.  $\Delta u_{\text{iw}}$  is the shift of the potential energy  $U$  when a water molecule in the water  
4 region was incorporated into the ice crystal in the system. The value of  $\Delta u_{\text{iw}}$  at each  
5 overpressure was estimated using  $\Delta u_{\text{iw}} = -3.7728 \times 10^{-5} \times \Delta P - 5.5221 \times 10^{-4}$ , which was  
6 determined by performing molecular dynamics simulations of bulk ice VI and water at high  
7 pressures separately.  $d_l$  is the thickness of a molecular layer of the ice plane, and  $N_l$  is the  
8 number of molecules in the layer.  $d_l/N_l = 1.3 \times 10^{-3}$  nm was used for estimation of  $v$  for all  
9 (101), (110), and (112) planes. The value of  $dU/dt$  was measured within whole  $t$  range for  $\Delta P$   
10 = 0.08 and 0.33 GPa and within 0-1.5 ns for  $\Delta P = 0.58$  GPa.

11 The computation was performed using a leap-frog algorithm with a time step of 1 fs [S22].  
12 During each simulation trial, temperature and pressure were maintained at 298 K and each  
13 pressure value by means of a method proposed by Berendsen *et al.* [S23]. The thermal and  
14 pressure bath constants were set to 0.1 and 2.0 ps, respectively. The simulations were  
15 performed with DL\_POLY 2.20 [S24]. The Coulomb interaction was estimated by using the  
16 Ewald method with an accuracy of  $10^{-6}$ . The real space cutoff distance was set to 10 Å and  
17 the Ewald convergence parameter was  $0.3208 \text{ \AA}^{-1}$ . The Lennard-Jones interaction acting  
18 between the oxygen atoms of a pair of water molecules was truncated at an intermolecular  
19 distance of 10 Å.

20

## 21 **10. Information on MD simulation; molecular density profile of interface**

22 The density profile for each plane was generated in the following manner. The system  
23 was divided into layers with the thickness of 0.2 Å along the direction normal to the interface,  
24 and the time-averaged number of oxygen atoms included in each layer over a period of 0.5 ns  
25 from the beginning of the simulation was calculated. The time-average number of oxygen  
26 atoms in each layer was normalized by the number of oxygen atoms that produces the density  
27 of  $1 \text{ g/cm}^3$ . Then, the density profile was calculated as the normalized number of oxygen  
28 atoms as a function of the layer position in the direction normal to the interface. It may be  
29 noted that the density profile of an ice-water interface obtained in an MD simulation does not  
30 significantly depend on the system size [S25].

1 Currently, it is not possible to obtain the density profiles shown in Figs. 4C and 4D using  
 2 the experimental data. However, the density, thermal expansion coefficient, and isothermal  
 3 compressibility of ice VI based on the TIP4P/Ice model are close to the experimental values  
 4 [S20, S26], which supports that the TIP4P/Ice model correctly reproduces well the structure  
 5 of ice VI in real systems. Therefore, we do not expect that the present density profiles  
 6 significantly differ from those in real systems. To confirm the reliability of the density  
 7 profiles shown in the manuscript, we also analyzed the density profiles using a modified six-  
 8 site model of H<sub>2</sub>O, which was recently proposed for simulations of ice and water [S28]. The  
 9 modified six-site model provided almost the same density profiles as in the TIP4P/Ice model  
 10 (Fig. S10). In previous studies [S22, S28], the interface structure obtained by an MD  
 11 simulation has been successfully used to explain the growth mechanism of ice in real systems,  
 12 regardless of the type of simulation system (the system for the growth at ice-water interfaces  
 13 and the system for the free growth of an ice crystal in water). Thus, we believe that the  
 14 density profiles obtained in this study are reliable and can be used to support the growth  
 15 mechanism of ice VI explained in the main manuscript.

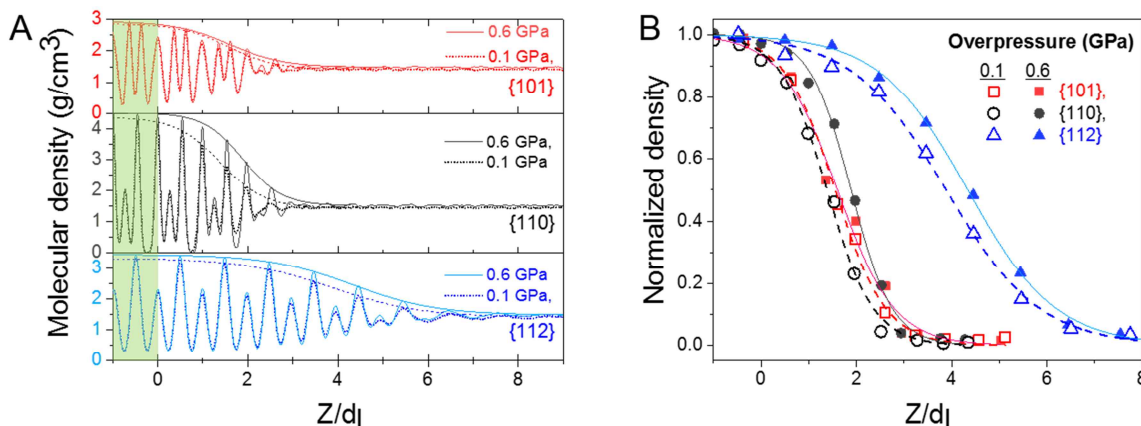

16 Fig. S10. (A) The density profiles at  $\Delta P = 0.1$  and  $0.6$  GPa, which were obtained using the modified  
 17 six-site model of H<sub>2</sub>O [S27]. We assumed that the equilibrium melting pressure of ice VI in the modif  
 18 ied six-site model was  $1.6$  GPa, because ice growth occurred at  $P > 1.6$  GPa and melting occurred at  
 19  $P < 1.6$  GPa. (B) Normalized envelope is fitted with the scaled interface distance,  $Z$  relative to the thi  
 20 ckness of molecular layer,  $d_l$  of each crystal plane.  
 21  
 22

23 Notably, the purpose of the present MD simulations was to elucidate the reason for the  
 24 larger growth speed for the {112} plane as compared to other planes at large  $\Delta P$ , but not to  
 25 reproduce the dimensional growth transition from 3-d to 2-d crystal. Since the size and time  
 26 scales of the MD simulation are much different from those in real systems, it is not possible  
 27 to numerically reproduce the growth transition from 3-d to 2-d crystal. Strictly speaking, the

1 growth speed at each plane and crystal morphology would be influenced not only by the  
2 growth mechanism at the molecular level but also by macroscopic quantities, such as the  
3 latent heat and convection. To discuss the relationship between the molecular-scale growth  
4 mechanism and the macroscopic crystal growth in detail, a large-scale macroscopic  
5 simulation, such as phase-field simulation [S29] will be required.

6 In addition, we note that quantum effects in ice and water were not taken into account in  
7 the present MD simulation. At present, we do not expect that the simulation results were  
8 significantly affected by errors originating from the lack of quantum effects. *Ab initio* water  
9 potentials tend to overestimate the melting point of ice [S30, S31]. Confirming the validity of  
10 the present simulation results by first-principle MD simulations [S32] or MD simulations  
11 with the potential model in which quantum effects are taken into account [S33] will be an  
12 important future work.

## 14 References

- 15 S1. Lee GW, Evans WJ, Yoo C-S (2006) Crystallization of water in a dynamic diamond-anvil cell: Evidence  
16 for ice VII-like local order in supercompressed water. *Phys Rev B* 74:134112.
- 17 S2. Lee GW, Evans WJ, Yoo CS (2007) Dynamic pressure-induced dendritic and shock crystal growth of ice  
18 VI. *Proc Natl Acad Sci USA* 104:9178-9181.
- 19 S3. Evans WJ, Yoo CS, Lee GW, Cynn H, Lipp MJ, Visbeck K (2007) Dynamic diamond anvil cell (dDAC):  
20 A novel device for studying the dynamic-pressure properties of materials. *Rev Sci Instr* 78:073904.
- 21 S4. Mallamace F, Corsaro C, Stanley HE (2012) A singular thermodynamically consistent temperature at the  
22 origin of the anomalous behavior of liquid water. *Sci Rep* 2:993.
- 23 S5. Katayama Y, Hattori T, Saitoh H, Ikeda T, Aoki K, Fukui H, Funakoshi K (2010) Structure of liquid  
24 water under high pressure up to 17 GPa. *Phys Rev B* 81:014109.
- 25 S6. Nguyen JH, Orlikowski D, Streitz FH, Holmes NC, Moriarty JA (2004) Specifically prescribed dynamic  
26 thermodynamic paths and resolidification experiments. *AIP Conf Proc* 706:1225.
- 27 S7. Pieranski P, Sittler L, Sotta P, Imperor-Clerc M (2001) Growth and shapes of a cubic lyotropic liquid  
28 crystal. *Eur Phys J E* 5:317-328.
- 29 S8. Kuhs WF, Finney JL, Vettier C, Bliss DV (1984) Structure and hydrogen ordering in ices VI, VII and  
30 VIII by neutron powder diffraction. *J Chem Phys* 81:3612-3623.
- 31 S9. Yamamoto K (1982) A morphological observation of ice VI. *Jpn J Appl Phys* 21:5
- 32 S10. Dunaeva AN, Antsyshkin DV, Kuskov OL (2010) Phase diagram of H<sub>2</sub>O: Thermodynamic functions of  
33 the phase transitions of high-pressure ices. *Sol Syst Res* 44:202.
- 34 S11. Abramson et al., (2004) Equation of state of water based on speeds of sound measured in the diamond-

- 1 anvil cell. *Geochimica et Cosmochimica Acta* 68:1827-1835.
- 2 S12. Mao HK, Xu I, Bell PM (1986) Calibration of the ruby pressure gauge to 800 kbar under quasi-  
3 hydrostatic conditions. *J Geophys Res* 91:4673-4676.
- 4 S13. Aziz MJ (1982) Model for solute redistribution during rapid solidification. *J Appl Phys* 53:1158-1168.
- 5 S14. Jackson KA, Beatty KM, Gudgel KA (2004) An analytical model for non-equilibrium segregation during  
6 crystallization. *J Crystal Growth* 271:481-494.
- 7 S15. Sobolev SL (2015) Rapid phase transformation under local non-equilibrium diffusion conditions. *Mater*  
8 *Sci Tech* 31:1607-1617.
- 9 S16. Tegze G, Tóth GI, Gránásy L (2011) Faceting and branching in 2D crystal growth. *Phys Rev Lett*  
10 106:195502.
- 11 S17. Tang S et al. (2014) Phase-field-crystal simulation of nonequilibrium crystal growth. *Phys Rev E*  
12 89:012405.
- 13 S18. Lemmon EW, McLinder MO, Friend DG (2016) *Thermophysical properties of fluid systems. NIST*  
14 *Chemistry WebBook: NIST Standard Reference Database*, eds Mallard PJ, W G (NIST, MD), Vol 69.
- 15 S19. Bezacier L, Journaux B, Perrillat J-P, Cardon H, Hanfland M, Daniel I (2014) Equations of state of ice VI  
16 and ice VII at high pressure and high temperature. *J Chem Phys* 141:104505.
- 17 S20. Abascal JLF, Sanz E, Fernández RG, Bega C (2005) A potential model for the study of ices and  
18 amorphous water: TIP4P/Ice. *J Chem Phys* 122:234511.
- 19 S21. Allen MP, Tildesley DJ (1987) *Computer Simulation of Liquid* (Clarendon Press, Oxford)
- 20 S22. Nada H, Furukawa Y (2005) Anisotropy in growth kinetics at interfaces between proton-disordered  
21 hexagonal ice and water: A molecular dynamics study using the six-site model of H<sub>2</sub>O. *J Crystal Growth*  
22 283:242-256.
- 23 S23. Berendsen HJC, Postma JPM, van Gunsteren WF, DiNola A, Haak JR (1984) Molecular dynamics with  
24 coupling to an external bath. *J Chem Phys* 81:3684-3690.
- 25 S24. Smith W, Forester TR (1996) DL\_POLY 2.0: A General-Purpose Parallel Molecular Dynamics Si-  
26 mulation Package. *J Mol Graphics* 14:136-141.
- 27 S25. Karim OA, Haymet ADJ (1988) The ice/water interface: A molecular dynamics simulation study. *J Chem*  
28 *Phys* 89:6889.
- 29 S26. Noya EG, Menduiña C, Aragonés JL, Vega C (2007) Equation of state, thermal expansion coefficient,  
30 and isothermal compressibility for ices Ih, II, III, V, and VI, as obtained from computer simulation. *J*  
31 *Phys Chem C* 111:15877-15888.
- 32 S27. Nada H (2016) Anisotropy in geometrically rough structure of ice prismatic plane interface during  
33 growth: Development of a modified six-site model of H<sub>2</sub>O and a molecular dynamics simulation. *J Chem*  
34 *Phys* 145:244706.
- 35 S28. Nada H (2011) Analysis of ice crystal growth shape under high pressure using molecular dynamics  
36 simulation. *Cryst Growth Des* 11:3130-3136.
- 37 S29. Kobayashi R (1993) Modeling and numerical simulations of dendritic crystal growth. *Physica D*

- 1 63:410-423.
- 2 S30. Du S, Yoo S, Li J (2017) Comparison of the melting temperatures of classical and quantum water  
3 potential models. *Front Phys* 5:34.
- 4 S31. Gillan MJ, Alfè D, Michaelides A (2016) Perspective: How good is DFT for water? *J Chem Phys* 144:  
5 130901.
- 6 S32. Schwegler E, Sharma M, Gygi F, Galli G (2008) Melting of ice under pressure. *Proc Natl Acad Sci USA*  
7 105:14779-14783.
- 8 S33. Donchev AG, Galkin NG, Illarionov AA, Khoruzhii OV, Olevanov MA, Ozrin VD, Subbotin MV,  
9 Tarasov VI (2006) Water properties from first principles: Simulations by a general-purpose quantum  
10 mechanical polarizable force field. *Proc Natl Acad Sci USA* 103:8613-8617.
